# Supplementary material for: Polarization-switching pathway determined electrical transport behaviors in rhombohedral BiFeO3 thin films
Source: Royal Society of Chemistry journal article supplement (doi:10.1039/d1nr03993h), 2021-01-01
Supplement: d1nr03993h1.pdf [file d1nr03993h1.pdf]

## Supplementary information

### **Polarization-switching pathway determined electrical transport behaviors in rhombohedral BiFeO<sub>3</sub> thin film**

Jing Wang<sup>1,2\*</sup>, Huayu Yang<sup>1</sup>, Yue Wang<sup>2</sup>, Yuanyuan Fan<sup>1</sup>, Di Liu<sup>1</sup>, Yuben Yang<sup>3</sup>, Jialu Wu<sup>2</sup>, Mingfeng Chen<sup>2</sup>, Rongzhen Gao<sup>1</sup>, Houbing Huang<sup>1</sup>, Xueyun Wang<sup>4</sup>, Jiawang Hong<sup>4</sup>, Jing Ma<sup>2</sup>, Jinxing Zhang<sup>3</sup>, Ce-Wen Nan<sup>2</sup>

1. Advanced Research Institute of Multidisciplinary Science, and School of Materials Science & Engineering, Beijing Institute of Technology, Haidian District, Beijing 100081, China
2. State Key Laboratory of New Ceramics and Fine Processing, School of Materials Science and Engineering, Tsinghua University, Beijing 100084, People's Republic of China
3. Department of Physics, Beijing Normal University, 100875 Beijing, China
4. School of Aerospace Engineering, Beijing Institute of Technology, Beijing 100081, China

Email: jwang@bit.edu.cn

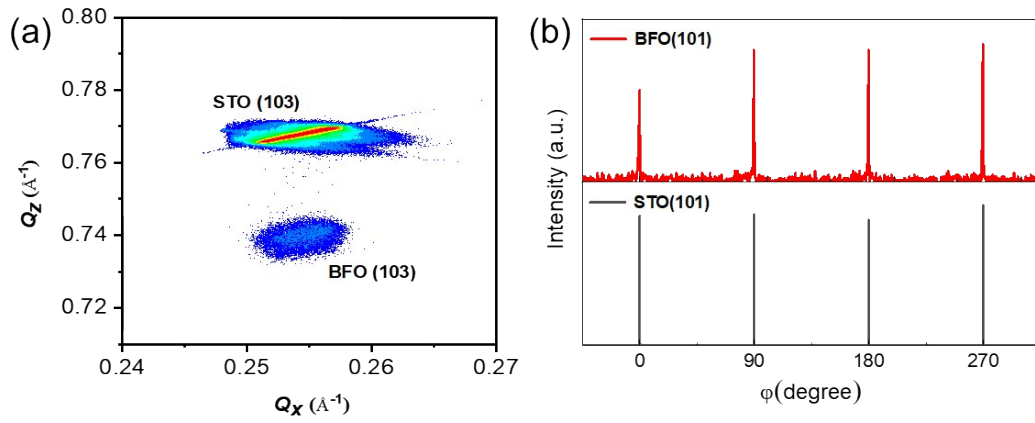

Fig. S1. RSM mapping (a) and a phi-scan (b) for (001)-oriented BFO/SRO/STO heterostructure, respectively.

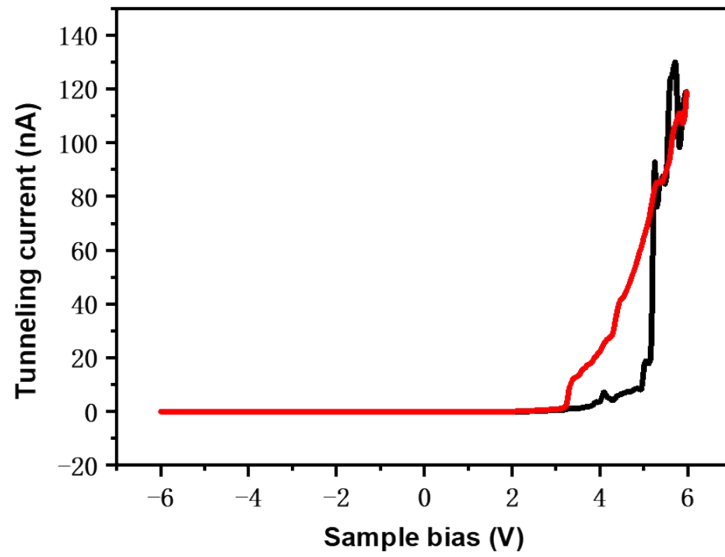

Fig. S2.  $I$ - $V$  curve with unidirectional current obtained in a ferroelectric capacitor with a point contact geometry.
